# Supplementary material
Source: PubMed Central journal article supplement (PMC3930568)
Supplement: NIHMS501881-supplement-1_si_001.pdf [file NIHMS501881-supplement-1_si_001.pdf]

Quantum and All-Atom Molecular Dynamics  
Simulations of Protonation and Divalent Ion  
Binding to Phosphatidylinositol 4,5-  
Bisphosphate (PIP<sub>2</sub>)

*David R. Slochower<sup>1</sup>, Peter J. Huwe<sup>1</sup>, Ravi Radhakrishnan<sup>1,2</sup>, and Paul A. Janmey<sup>1,3,\*</sup>*

<sup>1</sup>Graduate Group in Biochemistry and Molecular Biophysics, Perelman School of Medicine, <sup>2</sup>Department of Bioengineering, School of Engineering and Applied Sciences, <sup>3</sup>Department of Physiology, Perelman School of Medicine, University of Pennsylvania, Philadelphia, PA 19104,

\*Correspondence addressed to: Paul A. Janmey, 1010 Vagelos Laboratories, 3340 Smith Walk, University of Pennsylvania, Philadelphia, PA 19104, Tel: 215-300-9528, E-mail:

janmey@mail.med.upenn.edu

## Supporting Information

Using the Gaussian '09 program, the molecular geometry of PIP<sub>2</sub> was obtained using the Hartree-Fock scheme in conjunction with the 6-31+G(d) basis set. The initial structure contained a proton placed equidistant between oxygen atoms from the 4-phosphate and 5-phosphate groups. The final Z-matrix is as follows:

```
c
c 1 cc2
c 2 cc3          1 ccc3
c 3 cc4          2 ccc4          1 dih4
c 4 cc5          3 ccc5          2 dih5
c 5 cc6          4 ccc6          3 dih6
o 2 oc7          3 occ7          4 dih7
p 7 po8          2 poc8          3 dih8
o 8 op9          7 opo9          2 dih9
c 9 co10         8 cop10         7 dih10
c 10 cc11        9 cco11         8 dih11
c 11 cc12        10 ccc12        9 dih12
o 12 oc13        11 occ13        10 dih13
c 13 co14        12 coc14        11 dih14
o 14 oc15        13 oco15        12 dih15
o 3 oc16         2 occ16         7 dih16
o 4 oc17         3 occ17         2 dih17
o 5 oc18         4 occ18         3 dih18
p 18 po19        5 poc19         4 dih19
o 19 op20        18 opo20        5 dih20
o 6 oc21         5 occ21        18 dih21
p 21 po22        6 poc22         5 dih22
o 22 op23        21 opo23        6 dih23
o 1 oc24         2 occ24         7 dih24
o 8 op25         7 opo25        2 dih25
o 8 op26         7 opo26        2 dih26
o 19 op27        18 opo27        5 dih27
o 19 op28        18 opo28        5 dih28
o 22 op29        21 opo29        6 dih29
o 22 op30        21 opo30        6 dih30
o 11 oc31        10 occ31        9 dih31
c 31 co32        11 coc32        10 dih32
c 32 cc33        31 cco33        11 dih33
o 32 oc34        31 oco34        11 dih34
c 14 cc35        13 cco35        12 dih35
h 16 ho36        3 hoc36         2 dih36
h 17 ho37        4 hoc37         3 dih37
h 24 ho38        1 hoc38         2 dih38
h 2 hc39         7 hco39         8 dih39
h 3 hc40         2 hcc40         7 dih40
h 4 hc41         3 hcc41         2 dih41
h 5 hc42         18 hco42        19 dih42
h 6 hc43         21 hco43        22 dih43
h 1 hc44         2 hcc44         7 dih44
h 33 hc45        32 hcc45        31 dih45
h 35 hc46        14 hcc46        13 dih46
h 29 ho47        22 hop47        21 dih47
h 11 hc48        31 hco48        32 dih48
h 33 hc49        32 hcc49        31 dih49
h 33 hc50        32 hcc50        31 dih50
h 35 hc51        14 hcc51        13 dih51
```

|   |    |      |    |       |    |       |
|---|----|------|----|-------|----|-------|
| h | 35 | hc52 | 14 | hcc52 | 13 | dih52 |
| h | 10 | hc53 | 11 | hcc53 | 31 | dih53 |
| h | 10 | hc54 | 11 | hcc54 | 31 | dih54 |
| h | 12 | hc55 | 11 | hcc55 | 31 | dih55 |
| h | 12 | hc56 | 11 | hcc56 | 31 | dih56 |

|       |          |
|-------|----------|
| cc2   | 1.526344 |
| cc3   | 1.525584 |
| ccc3  | 110.464  |
| cc4   | 1.534422 |
| ccc4  | 107.977  |
| dih4  | -63.226  |
| cc5   | 1.536272 |
| ccc5  | 109.996  |
| dih5  | 65.784   |
| cc6   | 1.550422 |
| ccc6  | 112.130  |
| dih6  | -54.297  |
| oc7   | 1.430472 |
| occ7  | 114.252  |
| dih7  | 178.785  |
| po8   | 1.609872 |
| poc8  | 129.570  |
| dih8  | -76.014  |
| op9   | 1.654558 |
| opo9  | 100.649  |
| dih9  | 89.510   |
| co10  | 1.390493 |
| cop10 | 118.339  |
| dih10 | 56.942   |
| cc11  | 1.525172 |
| cco11 | 108.169  |
| dih11 | -175.973 |
| cc12  | 1.516607 |
| ccc12 | 112.077  |
| dih12 | 53.050   |
| oc13  | 1.444620 |
| occ13 | 109.903  |
| dih13 | 169.421  |
| co14  | 1.307801 |
| coc14 | 121.324  |
| dih14 | 88.633   |
| oc15  | 1.194599 |
| oco15 | 126.101  |
| dih15 | 1.910    |
| oc16  | 1.415805 |
| occ16 | 111.903  |
| dih16 | -54.700  |
| oc17  | 1.396342 |
| occ17 | 108.994  |
| dih17 | -171.724 |
| oc18  | 1.397510 |
| occ18 | 116.117  |
| dih18 | 178.192  |
| po19  | 1.724291 |
| poc19 | 127.832  |
| dih19 | 30.224   |
| op20  | 1.508970 |
| opo20 | 104.741  |
| dih20 | 50.797   |
| oc21  | 1.424589 |
| occ21 | 112.141  |
| dih21 | -64.455  |
| po22  | 1.622718 |
| poc22 | 126.247  |
| dih22 | -43.036  |
| op23  | 1.496990 |
| opo23 | 109.001  |
| dih23 | -30.862  |
| oc24  | 1.418164 |
| occ24 | 109.016  |

|       |          |
|-------|----------|
| dih24 | -63.339  |
| op25  | 1.484818 |
| opo25 | 106.531  |
| dih25 | -159.329 |
| op26  | 1.474582 |
| opo26 | 112.354  |
| dih26 | -22.804  |
| op27  | 1.504387 |
| opo27 | 102.301  |
| dih27 | 173.149  |
| op28  | 1.529475 |
| opo28 | 102.611  |
| dih28 | -68.029  |
| op29  | 1.621747 |
| opo29 | 100.814  |
| dih29 | 84.774   |
| op30  | 1.485743 |
| opo30 | 108.720  |
| dih30 | -162.053 |
| oc31  | 1.445320 |
| occ31 | 104.664  |
| dih31 | 170.387  |
| co32  | 1.300480 |
| coc32 | 123.522  |
| dih32 | 142.520  |
| cc33  | 1.510033 |
| cco33 | 110.400  |
| dih33 | 176.609  |
| oc34  | 1.200221 |
| oco34 | 126.449  |
| dih34 | -3.727   |
| cc35  | 1.510545 |
| cco35 | 110.753  |
| dih35 | -177.884 |
| ho36  | 0.955083 |
| hoc36 | 111.918  |
| dih36 | -68.963  |
| ho37  | 0.977482 |
| hoc37 | 105.034  |
| dih37 | 170.673  |
| ho38  | 0.948667 |
| hoc38 | 105.953  |
| dih38 | 52.346   |
| hc39  | 1.082596 |
| hco39 | 108.137  |
| dih39 | 45.153   |
| hc40  | 1.082127 |
| hcc40 | 109.459  |
| dih40 | 61.497   |
| hc41  | 1.086439 |
| hcc41 | 107.608  |
| dih41 | -53.191  |
| hc42  | 1.080006 |
| hco42 | 104.771  |
| dih42 | 145.460  |
| hc43  | 1.080634 |
| hco43 | 105.331  |
| dih43 | -159.036 |
| hc44  | 1.080878 |
| hcc44 | 107.794  |
| dih44 | 54.135   |
| hc45  | 1.083874 |
| hcc45 | 109.720  |
| dih45 | 56.197   |
| hc46  | 1.083719 |
| hcc46 | 110.223  |
| dih46 | -49.020  |
| ho47  | 0.961524 |
| hop47 | 112.864  |
| dih47 | -26.260  |
| hc48  | 1.079439 |

|       |          |
|-------|----------|
| hco48 | 108.416  |
| dih48 | 22.809   |
| hc49  | 1.084019 |
| hcc49 | 109.203  |
| dih49 | -61.054  |
| hc50  | 1.082332 |
| hcc50 | 110.002  |
| dih50 | 177.802  |
| hc51  | 1.082120 |
| hcc51 | 109.751  |
| dih51 | -170.839 |
| hc52  | 1.084700 |
| hcc52 | 108.552  |
| dih52 | 69.339   |
| hc53  | 1.086291 |
| hcc53 | 109.176  |
| dih53 | -68.761  |
| hc54  | 1.081245 |
| hcc54 | 108.631  |
| dih54 | 49.990   |
| hc55  | 1.075921 |
| hcc55 | 110.080  |
| dih55 | 175.558  |
| hc56  | 1.077606 |
| hcc56 | 111.112  |
| dih56 | -62.016  |

| Proton on 5-phosphate                                                             | Proton shared between 4 and 5                                                      | Proton on 4-phosphate                                                               |
|-----------------------------------------------------------------------------------|------------------------------------------------------------------------------------|-------------------------------------------------------------------------------------|
| 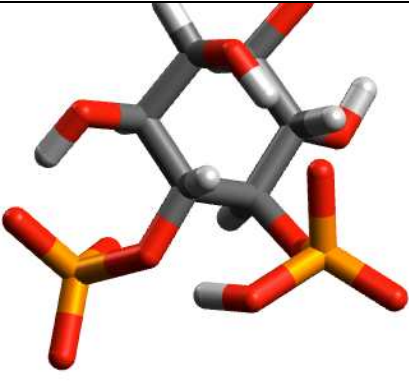 |  |  |
| +15.4 kcal/mol                                                                    | 0 kcal/mol                                                                         | +22.0 kcal/mol                                                                      |

Figure S1. Relative energies of protonation isomers. The relative stabilities of protonated PIP<sub>2</sub> isomers were computed with Gaussian 09 at the HF/3-21G level of theory with implicit water solvent using a Polarizable Continuum Model<sup>1-3</sup>. Relaxed dihedral potential energy scans were used to identify energetic minima among isomers. In the lowest energy structure (middle panel), the proton is shared between the 4 and 5-phosphates. The distances from the proton to the 5 and 4-phosphate oxygens are 1.11 Å and 1.30 Å, respectively. This shared state is 15.4 kcal/mol and 22.0 kcal/mol more stable than localization to the 5-phosphate (left panel) or the 4-phosphate (right panel), respectively.

Our results are obtained from all-atom molecular dynamics simulations of membrane bilayers of 800 total lipids containing PIP<sub>2</sub> in the presence of phosphatidylcholine (PC), phosphatidylserine (PS), phosphatidylethanolamine (PE), and cholesterol with 150 mM NaCl in a solvent box containing approximately 80,000 waters. The outer leaflet contains 300 POPC [3-palmitoyl-2-oleoyl-D-glycero-1-phosphatidylcholine] molecules and 100 cholesterol molecules. The inner leaflet contains 200 DOPE [2,3-dioleoyl-D-glycero-1-phosphatidylethanolamine] molecules, 100 cholesterol molecules, 60 DOPS [2,3-dioleoyl-D-glycero-1-phosphatidylserine] molecules, 40 SA-PIP<sub>2</sub> [1-stearoyl-2-arachadonyl-*sn*-glycero-1-phosphatidylinositol-4,5-bisphosphate] molecules. The lipids were packed at approximately 65 Å<sup>2</sup> per lipid and randomly seeded with PIP<sub>2</sub> typically about 10% of the total lipids on one leaflet. The system was equilibrated for 10 ns before the production run, for which the analysis is presented below. We used the CHARMM36 lipid forcefield in the GROMACS simulation package<sup>4-7</sup> to prepare membrane bilayers in an NPT ensemble and have simulated for 31 ns so far, using a 2 fs timestep. Pressure is maintained using the Parrinello-Rahman barostat<sup>8,9</sup>, coupled independently (semi-isotropic) in directions normal and perpendicular to the bilayer with a time constant of 2.0 ps and a pressure of 1 bar. Electrostatics are treated with the particle mesh Ewald (PME)<sup>10</sup> method with cubic periodic boundaries, using a real space cutoff of 1.2 nm and a Fourier grid spacing of 0.16 nm with cubic interpolation. Temperature coupling is accomplished using the thermostat due to Bussi<sup>11</sup>, in which velocity is rescaled with a stochastic term. These simulations employ the CHARMM-specific TIP3P (i.e., TIPS3P) water model (with van der Waals interactions on the water hydrogen atoms) and van der Waals interactions which are smoothly switched off between 0.8 and 1.2 nm<sup>12</sup>.

Histograms were computed (Figure S2) for the QM/MM simulations presented in the main text (a single PIP<sub>2</sub> molecule in a water sphere) and for each lipid every 20 frames of the classical all-atom trajectory. The head-tail angle was measured as described in the main text. Our QM/MM and classical bilayer simulation results quantitatively agree with each other, but disagree if we employ the parameters of Lupyan, et al.

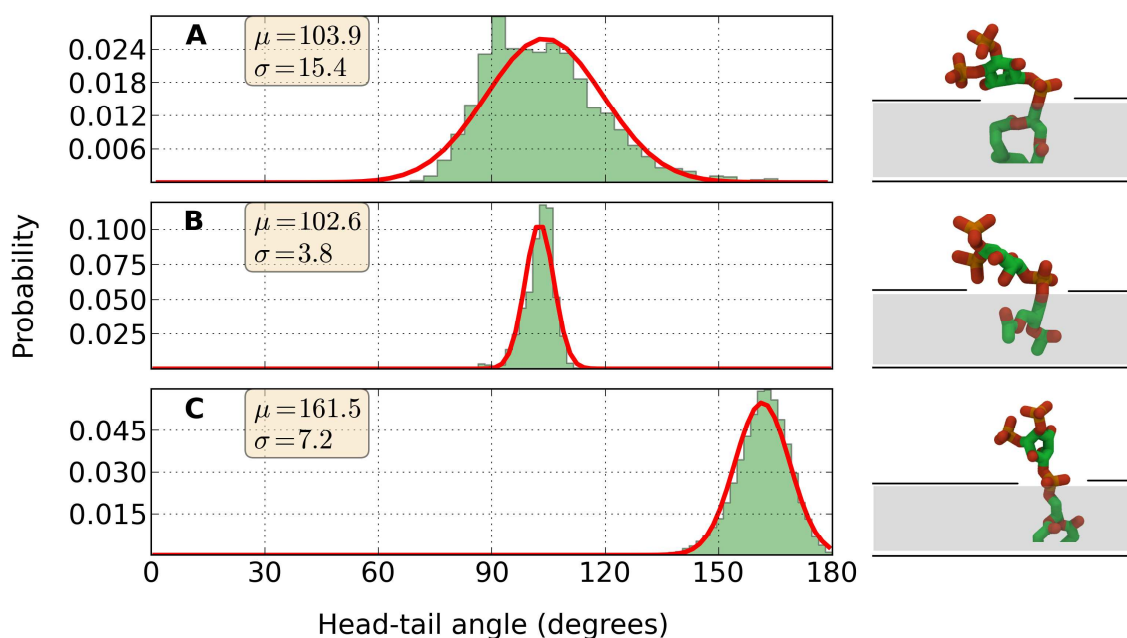

Figure S2. **A.** The probability distribution for 80 PIP<sub>2</sub> lipids in one leaflet of a bilayer also containing phosphatidylserine, phosphatidylethanolamine, and cholesterol. The histogram was averaged over each lipid and every 20 frames of the all-atom simulation for 15 ns using CHARMM36 lipid parameters. The mean head-tail angle is 104 degrees. **B.** The probability distribution of the angle between the PIP<sub>2</sub> headgroup and the PIP<sub>2</sub> acyl chains as measured from an isolated PIP<sub>2</sub> molecule in a water sphere over 10 ps of a QM/MM simulation. Sodium ions were present for charge neutrality but fixed to be  $\sim 10$  Å away from the PIP<sub>2</sub>. The mean head-tail angle is 103 degrees. **C.** The probability distribution from a simulation of a bilayer containing pure PIP<sub>2</sub> using the same system parameters as panel A, but with the parameters of Lupyan, et al. used instead of the CHARMM36 lipid parameters<sup>13</sup>. The average head-tail angle is 162 degrees.



We computed the average PIP<sub>2</sub> molecular area in membrane bilayer systems to compare with the QM/MM results presented in the main text. Since there was only a single molecule in the QM/MM simulations, we used the separation of the phosphate groups as a proxy for molecular area. To calculate the molecular area in the bilayer simulations, we projected the center of gravity of each lipid onto a plane and created a Delaunay triangulation. We summed the area created by forming a polygon from the bisector of each line meeting a vertex corresponding to PIP<sub>2</sub>. There are subtleties in defining the average molecular area of lipids in a heterogeneous bilayer simulation and these methods are still evolving.

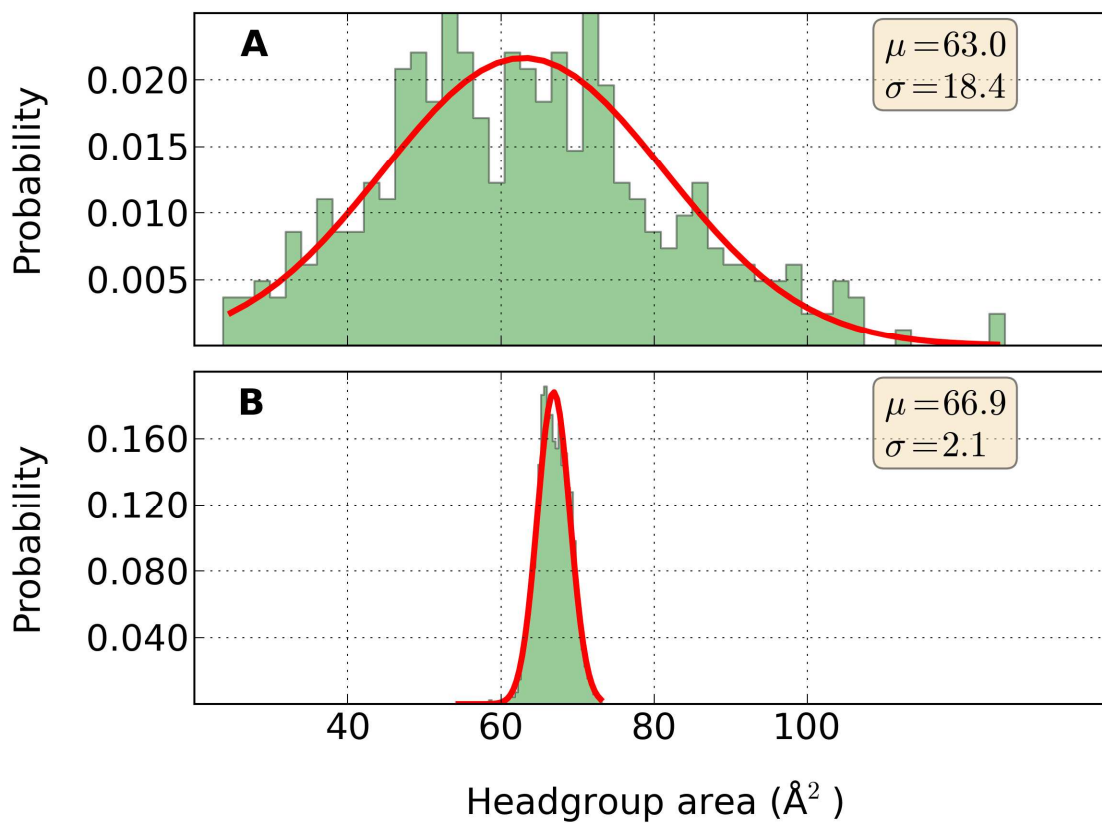

Figure S3. **A.** The probability distribution for 80 PIP<sub>2</sub> lipids in a bilayer also containing phosphatidylcholine, phosphatidylserine, and phosphatidylethanolamine. **B.** The probability distribution of the approximate molecular area of PIP<sub>2</sub> as measured from an isolated PIP<sub>2</sub> molecule in a water sphere over 10 ps of a QM/MM simulation. Sodium were present for charge neutrality but fixed to be ~10 Å away from the PIP<sub>2</sub>.

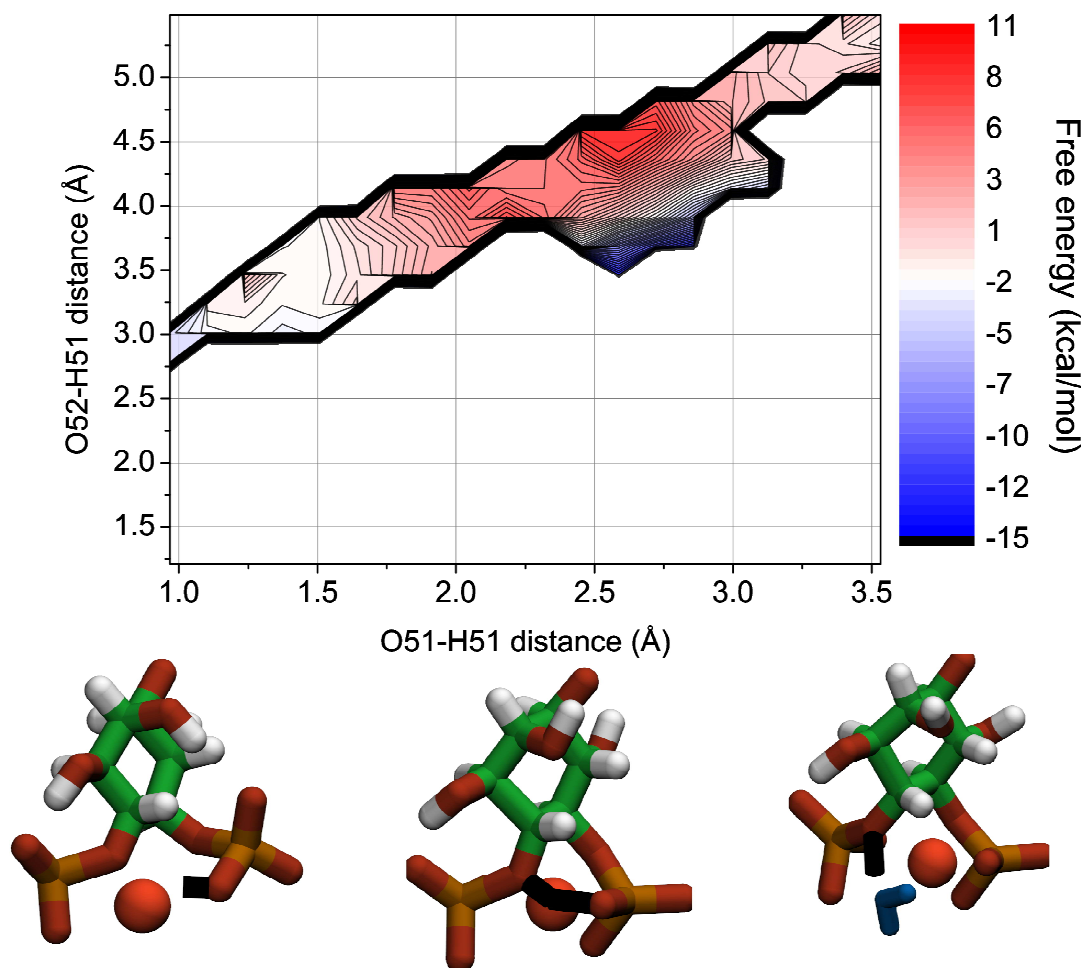

Figure S4. The free energy landscape for dissociating a proton from the 5-phosphate group of PIP<sub>2</sub>. Full deprotonation in the presence of magnesium has not been achieved. Insets show magnesium (in red) between the two phosphomonoester groups of PIP<sub>2</sub> and the proton to be dissociated in black. The initial state of the QM/MM 2D umbrella sampling is on the left, with proton H51 bound to oxygen O51. The inset in the middle corresponds to the energy well on the contour plot (blue), where proton H51 is shared between oxygen O51 and oxygen O4P. The inset on the right corresponds to the final window of the trajectory, where proton H51 is shared between oxygen O4P of PIP<sub>2</sub> and a QM water (in blue).

It is possible to calculate pKa values from the free energy plots presented in the main text. To do this, we consider the canonical definition of the association constant,  $K_a$ , between a ligand, L, and its binding partner, R, in terms of the ratio of the probabilities of being not bound or bound. In this case, we take the ligand to be a proton and its binding partner to be a PIP<sub>2</sub> molecule. So we write,

$$K_a = \frac{1}{[L]} \times \frac{\mathcal{P}_{\text{bound}}}{\mathcal{P}_{\text{unbound}}}$$

where  $\mathcal{P}_{\text{bound}}$  and  $\mathcal{P}_{\text{unbound}}$  can be determined by integrating over the degrees of freedom and the potentials of mean force. pKa is related to K using the following relationship:

$$\text{pKa} = \log_{10} \left| K_a \times \frac{1}{1661 \text{ \AA}^3} \right| \text{ using the standard concentration of } 1 \text{ mol/liter} = 1/1661 \text{ \AA}^3.$$

We can perform the pKa calculation in two ways. In the first method, we integrate the bound state until  $r = r^*$  which is the point where the proton leaves the domain of influence of the oxygen to which it was originally bound. This is judged by viewing the simulation trajectories and looking at the minima of the potentials of mean force. The unbound state is integrated from  $r = r^*$  until the final point in the energy landscape.

In the second method, we integrate the bound state until  $r = r^*$  as before. To evaluate the unbound state, we integrate from  $r = r^*$  until the next metastable minimum at  $r = r^{**}$ . In this technique, events that we categorize as dissociation, such as proton transfer to other atoms on PIP<sub>2</sub>, may not correspond to dissociation events judged from experiments.

Values for  $r^*$  and  $r^{**}$  and the results of these calculations are shown in Figure S5. Error

bars in the pKa calculation represent the outcome of changing the value of  $r^*$  by 0.25 Å or approximately the width of a well in the potential of mean force.

We stress that the absolute value of these numbers should not be compared to the results of experiments due to the approximations necessary in obtaining absolute free energy curves from the potentials of mean force calculated along a single reaction coordinate. Kooijman et al. calculate the pKa of PIP<sub>2</sub> in lipid vesicles, which is different from our case in several respects (e.g., the effect of a negative surface charge density of the vesicle membrane) so a direct comparison is not strictly valid<sup>14</sup>. Moreover, the pKa values reported by Kooijman et al. correspond to PI(3,5)P<sub>2</sub> and PI(3,4,5)P<sub>2</sub> which could have different ionization properties due to the positioning of the phosphate groups. In fact, for PI(4,5)P<sub>2</sub>, Kooijman et al. note that a biphasic pH-dependent ionization behavior that cannot be explained by a Henderson-Hasselbach equation was obtained. Our calculations are consistent with this; our free energy landscape does not simply represent two states (bound or unbound) but displays intermediate metastable states. These states correspond to sharing of the proton between the vicinal phosphomonoester groups. Hence, our pKa should be regarded as an apparent pKa for proton transfer from the host oxygen (O51 in the main text) to the next energetically favorable state (rather than a free unbound state).

The subtleties caused by a complex (rugged) free energy landscape and non-independence of proton binding to vicinal sites cause problems in defining an absolute pKa; moreover, the apparent pKa is subject to the definitions of vicinal binding sites as metastable states (or our choice of  $r^{**}$ ). Another complexity is a computational one. In the QM/MM potentials of mean force, the energy landscape is only accurate for short

excursions from the initial bound state along the reaction coordinate. For longer excursions, the wave functions from the QM region are spread over larger volumes causing an imbalance in basis set superposition. Also for these large distances along the reaction coordinate, close interaction between classical charges and the QM wave function become significant.

In general, we find that the pKa for protonation of PIP<sub>2</sub> in the presence of calcium is the smallest, implying strong dissociation of the proton. The pKa in the presence of magnesium is similar to that of a pure water environment, where we find protonation of PIP<sub>2</sub> on the 5-phosphate group to be the most stable conformation.

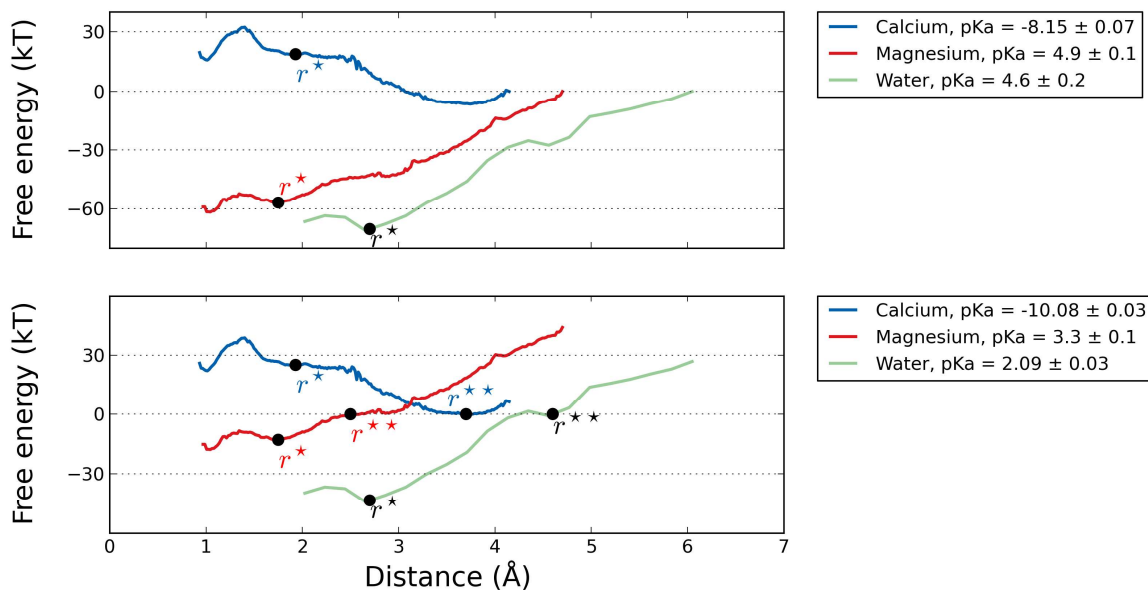

Figure S5. The potentials of mean force for proton dissociation from PIP<sub>2</sub> in a water sphere with either calcium, magnesium, or pure water. In the latter case, sodium ions are present for charge neutrality but confined  $\sim 10$  Å away from the PIP<sub>2</sub>.

- (1) Miertuš, S.; Scrocco, E.; Tomasi, J. Electrostatic Interaction of a Solute with a Continuum. A Direct Utilization of Ab Initio Molecular Potentials for the Prevision of Solvent Effects *Chem. Phys.* **1981**, *55*, 117–129.
- (2) Pascual-ahuir, J. L.; Silla, E.; Tu on, I. GEPOL: an Improved Description of Molecular Surfaces. III. a New Algorithm for the Computation of a Solvent-Excluding Surface *J. Comp. Chem.* **1994**, *15*, 1127–1138.
- (3) Tomasi, J.; Mennucci, B.; Cammi, R. Quantum Mechanical Continuum Solvation Models. *Chem. Rev.* **2005**, *105*, 2999–3093.
- (4) Van Der Spoel, D.; Lindahl, E.; Hess, B.; Groenhof, G.; Mark, A. E.; Berendsen, H. J. C. GROMACS: Fast, Flexible, and Free *J. Comp. Chem.* **2005**, *26*, 1701–1718.
- (5) Bjelkmar, P.; Larsson, P.; Cuendet, M. A.; Hess, B.; Lindahl, E. Implementation of the CHARMM Force Field in GROMACS: Analysis of Protein Stability Effects From Correction Maps, Virtual Interaction Sites, and Water Models *J. Chem. Theo. Comput.* **2010**, *6*, 459–466.
- (6) Klauda, J. B.; Monje, V.; Kim, T.; Im, W. Improving the CHARMM Force Field for Polyunsaturated Fatty Acid Chains. *J. Phys. Chem. B* **2012**, *116*, 9424–9431.
- (7) Klauda, J. B.; Venable, R. M.; Freites, J. A.; O'Connor, J. W.; Tobias, D. J.; Mondragon-Ramirez, C.; Vorobyov, I.; Mackerell, A. D., Jr; Pastor, R. W. Update of the CHARMM All-Atom Additive Force Field for Lipids: Validation on Six Lipid Types. *J. Phys. Chem. B* **2010**, *114*, 7830–7843.
- (8) Parrinello, M.; Rahman, A. Polymorphic Transitions in Single Crystals: a New Molecular Dynamics Method *Journal of Applied physics* **1981**.
- (9) Nose, S.; Klein, M. L. Constant Pressure Molecular Dynamics for Molecular Systems *Mol. Phys.* **1983**.
- (10) Darden, T.; York, D.; Pedersen, L. Particle Mesh Ewald: an  $N \log(N)$  Method for Ewald Sums in Large Systems *J. Chem. Phys.* **1993**, *98*, 10089.
- (11) Bussi, G.; Donadio, D.; Parrinello, M. Canonical Sampling Through Velocity Rescaling *J. Chem. Phys.* **2007**, *126*, 014101.
- (12) Piggot, T. J.; Piñeiro, A.; Khalid, S. Molecular Dynamics Simulations of Phosphatidylcholine Membranes: a Comparative Force Field Study *J. Chem. Theo. Comput.* **2012**, *8*, 4593–4609.
- (13) Lupyan, D.; Mezei, M.; Logothetis, D. E.; Osman, R. A Molecular Dynamics Investigation of Lipid Bilayer Perturbation by PIP2. *Biophys. J.* **2010**, *98*, 240–247.
- (14) Kooijman, E. E.; King, K. E.; Gangoda, M.; Gericke, A. Ionization Properties of Phosphatidylinositol Polyphosphates in Mixed Model Membranes *Biochemistry* **2009**, *48*, 9360–9371.
